# Supplementary material
Source: PubMed Central journal article supplement (PMC3870743)
Supplement: 1321305110_pnas.201321305SI.pdf [file 1321305110_pnas.201321305SI.pdf]

# Supporting Information

Grady et al. 10.1073/pnas.1321305110

**Dataset S1.** An siRNA screen identifies cellular metabolic enzymes involved in HSV-1 replication. Robust z scores were calculated for each independent siRNA tested in the screen as described in *Materials and Methods*. Scores for each of the three siRNAs targeting a single gene are listed together. Genes are arranged alphabetically

[Dataset S1](#)
